# Supplementary material
Source: publisher figshare collection journal article supplement (https://tandf.figshare.com/articles/dataset/_/9730304)
Supplement: Supplementary file 2 [file 1]

# Low Proportions of Folic Acid Deficiency after Introduction of Mandatory Folic Acid Fortification in Remote Areas of Northern Queensland, Australia: A Secondary Health Data Analysis

Anna Slagman, Linton Harriss, Sandra Campbell, Reinhold Muller, Robyn McDermott

## SUPPLEMENT 2

### SUPPLEMENTAL TABLE 3

DISTRIBUTION OF DEMOGRAPHIC CHARACTERISTICS, URBAN AND REMOTE RESIDENCE AND INDIGENOUS STATUS WITHIN THE STUDY POPULATION DURING THE STUDY PERIOD

|                              | 2004          | 2005          | 2006          | 2007          | 2008          | 2009          | 2010          | 2011          | 2012          | 2013          | 2014          | 2015          |
|------------------------------|---------------|---------------|---------------|---------------|---------------|---------------|---------------|---------------|---------------|---------------|---------------|---------------|
| Cases (n)                    | 505           | 619           | 655           | 933           | 1232          | 1555          | 1440          | 1423          | 1282          | 1359          | 1431          | 1495          |
| Female gender<br>% (n)       | 59.4<br>(300) | 53.5<br>(331) | 53.4<br>(350) | 51.8<br>(483) | 53.4<br>(658) | 56.4<br>(877) | 55.3<br>(797) | 58.0<br>(825) | 50.7<br>(650) | 53.9<br>(732) | 52.5<br>(751) | 53.6<br>(801) |
| Age<br>Median (IQR)          | 44<br>(32-60) | 49<br>(34-64) | 49<br>(34-67) | 51<br>(36-70) | 49<br>(33-68) | 53<br>(36-71) | 49<br>(31-68) | 52<br>(35-69) | 53<br>(35-71) | 53<br>(37-71) | 52<br>(36-69) | 54<br>(36-73) |
| Indigenous<br>valid% (n)     | 43.2<br>(218) | 36.5<br>(226) | 35.4<br>(232) | 28.7<br>(268) | 34.3<br>(422) | 39.5<br>(615) | 33.8<br>(487) | 31.8<br>(452) | 22.5<br>(289) | 21.5<br>(292) | 26.5<br>(379) | 24.1<br>(360) |
| Urban<br>% (n)               | 47.9<br>(242) | 51.5<br>(319) | 51.0<br>(334) | 57.1<br>(533) | 44.8<br>(552) | 44.4<br>(691) | 50.4<br>(726) | 51.7<br>(736) | 59.9<br>(768) | 58.1<br>(790) | 52.9<br>(757) | 55.8<br>(834) |
| Remote<br>% (n)              | 52.1<br>(263) | 49.0<br>(321) | 49.0<br>(321) | 52.9<br>(400) | 55.2<br>(680) | 55.6<br>(864) | 49.6<br>(714) | 48.3<br>(687) | 40.1<br>(514) | 41.9<br>(569) | 47.1<br>(674) | 44.2<br>(661) |
| Urban<br>Indigenous<br>% (n) | 21.5<br>(52)  | 19.4<br>(62)  | 13.5<br>(45)  | 10.3<br>(55)  | 11.6<br>(64)  | 12.9<br>(89)  | 12.1<br>(88)  | 9.9 (73)      | 10.5<br>(81)  | 12.4<br>(98)  | 12.0<br>(91)  | 9.5 (79)      |

|                               |               |               |               |               |               |               |               |               |               |               |               |               |
|-------------------------------|---------------|---------------|---------------|---------------|---------------|---------------|---------------|---------------|---------------|---------------|---------------|---------------|
| Remote<br>Indigenous<br>% (n) | 63.1<br>(166) | 54.7<br>(164) | 58.3<br>(187) | 53.3<br>(213) | 52.6<br>(358) | 60.9<br>(526) | 55.9<br>(399) | 55.2<br>(379) | 40.5<br>(208) | 34.1<br>(194) | 42.7<br>(288) | 42.5<br>(281) |
|-------------------------------|---------------|---------------|---------------|---------------|---------------|---------------|---------------|---------------|---------------|---------------|---------------|---------------|
