# Supplementary material
Source: publisher figshare collection journal article supplement (https://tandf.figshare.com/articles/dataset/_/9730304)
Supplement: Supplementary file 3 [file 1]

# Low Proportions of Folic Acid Deficiency after Introduction of Mandatory Folic Acid Fortification in Remote Areas of Northern Queensland, Australia: A Secondary Health Data Analysis

Anna Slagman, Linton Harriss, Sandra Campbell, Reinhold Muller, Robyn McDermott

## SUPPLEMENT 1

### ASSAYS USED FOR FOLIC ACID TESTING DURING STUDY PERIOD

#### Red Cell Folates Test History

|                  |                 |        |        |        |
|------------------|-----------------|--------|--------|--------|
| Reference Ranges |                 |        |        |        |
| Mnemonic         | RCFOL           |        | Format | 3N     |
| Description      | Folate Red Cell |        | Units  | nmol/L |
|                  |                 |        |        |        |
| Start Date       | Fasting         | Method | Low    | Upper  |
| 07.09.2002       | no              |        | 634.0  |        |
| 01.06.2007       | no              |        | 537.0  |        |
| 05.12.2007       | no              |        | 356.0  |        |

Supplemental table 1

#### Serum Folates Test History

|                  |              |        |        |        |
|------------------|--------------|--------|--------|--------|
| Reference Ranges |              |        |        |        |
| Mnemonic         | SFOL         |        | Format | 2N.1N  |
| Description      | Folate Serum |        | Units  | nmol/L |
|                  |              |        |        |        |
| Start Date       | Fasting      | Method | Low    | Upper  |
| 09.09.2002       | no           | ACS    | 12.20  |        |
| 19.06.2007       | no           | BECK   | 11.80  |        |
| 14.06.2011       | no           | ACCESS | 11.80  |        |
| 27.06.2011       | no           | BECK   | 7.00   |        |
| 27.06.2011       | no           | ACCESS | 7.00   |        |

Supplemental table 2
